# Supplementary material
Source: MDPI journal article supplement (https://www.mdpi.com/2077-0472/14/1/125)
Supplement: s1 [file s1 › agriculture-2759565-supplementary.pdf]

Table S1. Quality statistics of filtered reads

| Sample ID | Clean reads (Mb) | Clean Base (Gb) | GC (%) | Q20 (%) | Q30 (%) |
|-----------|------------------|-----------------|--------|---------|---------|
| N0(CK)    | 24.57            | 7.37            | 42.86  | 98.26   | 94.58   |
| N1        | 28.33            | 8.50            | 42.53  | 98.27   | 94.60   |
| N2        | 22.51            | 6.75            | 43.07  | 98.31   | 94.73   |
| N3        | 25.19            | 7.56            | 43.40  | 98.34   | 94.79   |

Table S2. Tatistical data of reads mapping

| Sample ID | Total clean reads | Reads mapped ratio | Multi mapped ratio | Uniq mapped ratio | Reads plus ratio | Reads minus ratio |
|-----------|-------------------|--------------------|--------------------|-------------------|------------------|-------------------|
| N0(CK)    | 49,130,516        | 69.05%             | 0.35%              | 99.65%            | 64.94%           | 35.06%            |
| N1        | 56,664,610        | 66.48%             | 0.39%              | 99.61%            | 66.08%           | 33.92%            |
| N2        | 45,007,535        | 67.87%             | 0.36%              | 99.64%            | 65.51%           | 34.49%            |
| N3        | 50,386,843        | 70.02%             | 0.32%              | 99.68%            | 64.46%           | 35.54%            |

Table S3. Different genes related to anthocyanidin synthesis pathways in purple potato tubers with different nitrogen levels

| Gene annotation | ReSeq ID             |
|-----------------|----------------------|
| LAR             | PGSC0003DMG400020471 |
| DFR             | PGSC0003DMG400003605 |
| AT              | PGSC0003DMG400029263 |
| CHS             | PGSC0003DMG400029620 |
| UFGT            | PGSC0003DMG400031454 |
|                 | PGSC0003DMG400029130 |
|                 | PGSC0003DMG400033567 |
| F3H             | PGSC0003DMG400007232 |
|                 | PGSC0003DMG400010666 |

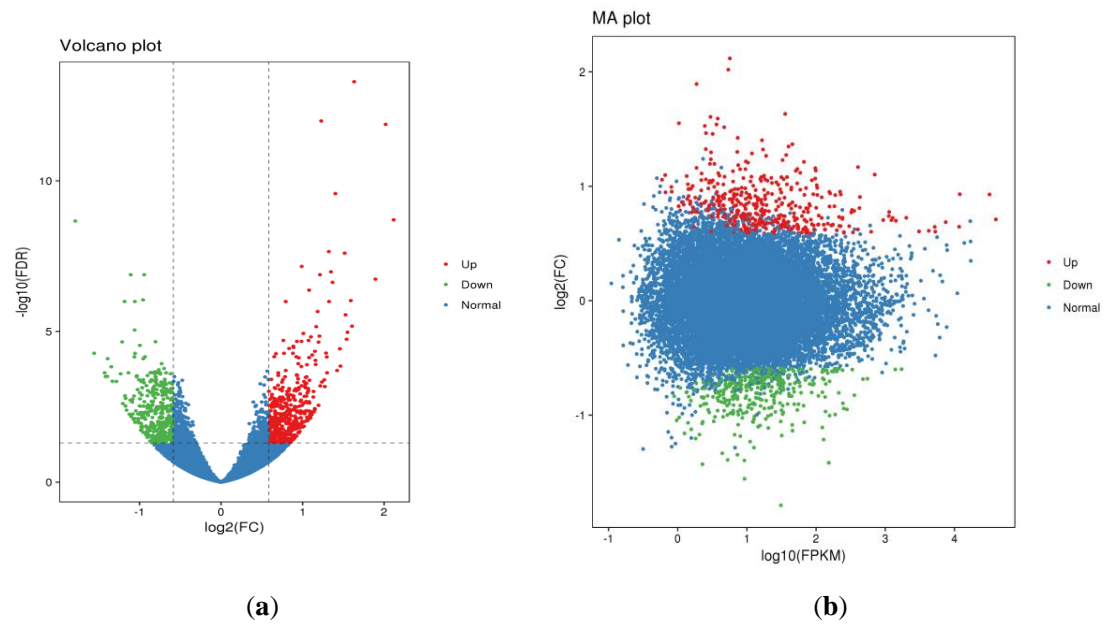

Figure S1. Volcano plots (a) and MA plot (b) of the DEGs upregulated and downregulated between N0 VS N1 treatments.

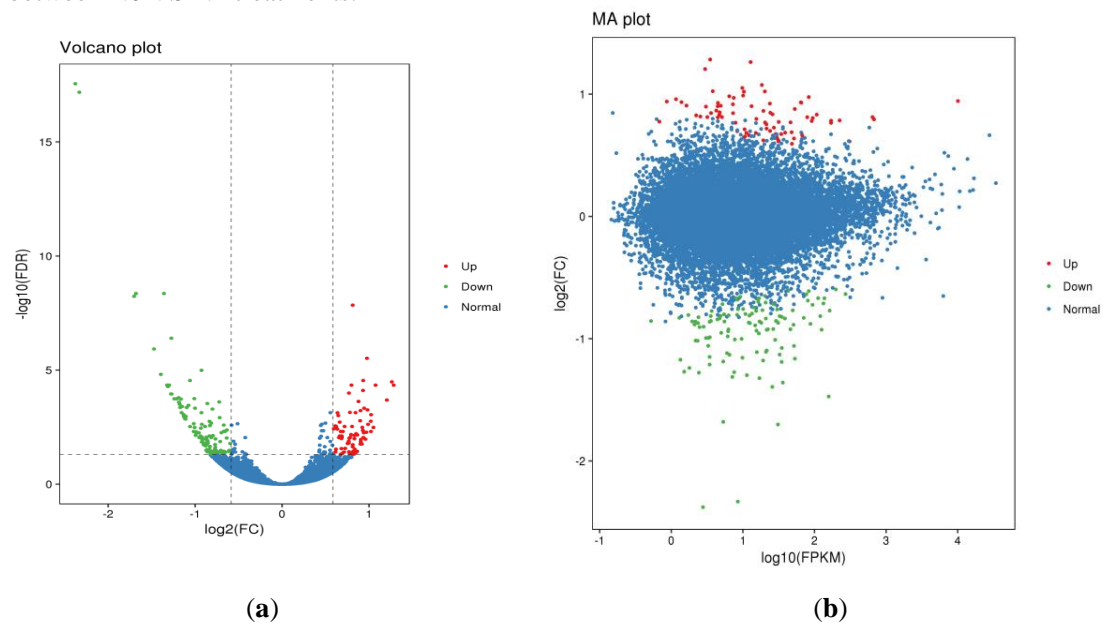

Figure S2. Volcano plots (a) and MA plot (b) of the DEGs upregulated and downregulated between N0 VS N2 treatments.

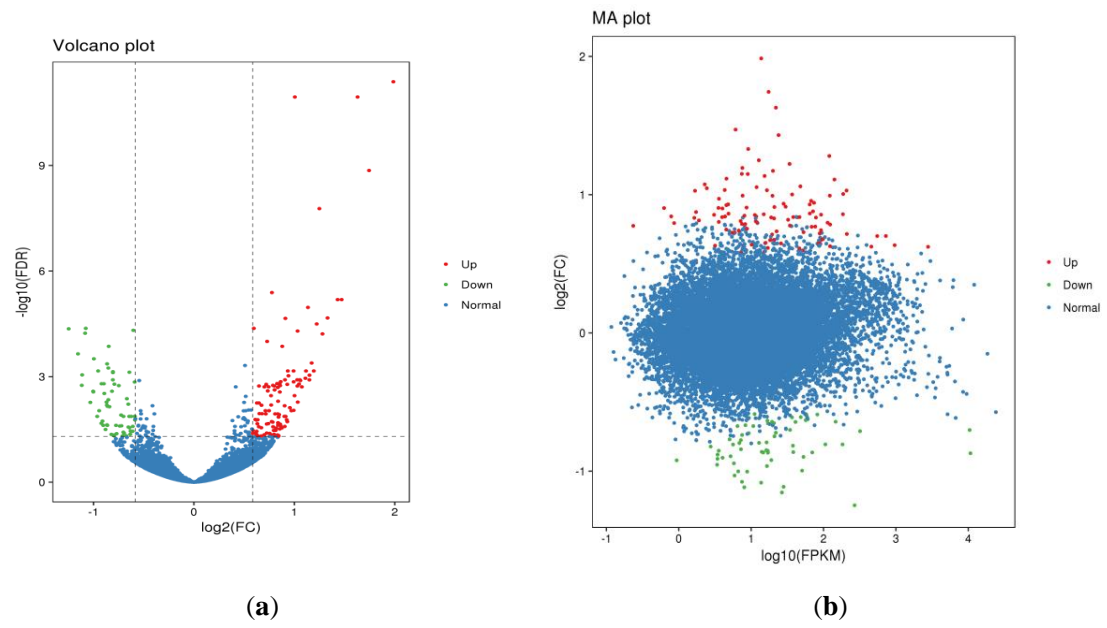

Figure S3. Volcano plots (a) and MA plot (b) of the DEGs upregulated and downregulated between N0 VS N3 treatments.

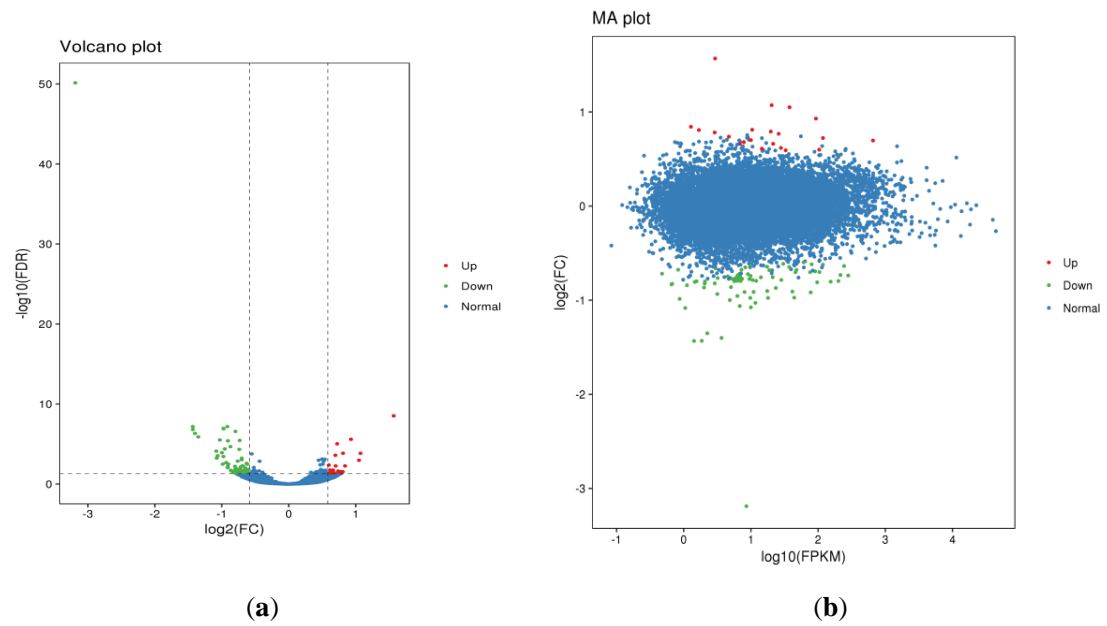

Figure S4. Volcano plots (a) and MA plot (b) of the DEGs upregulated and downregulated between N1 VS N2 treatments.

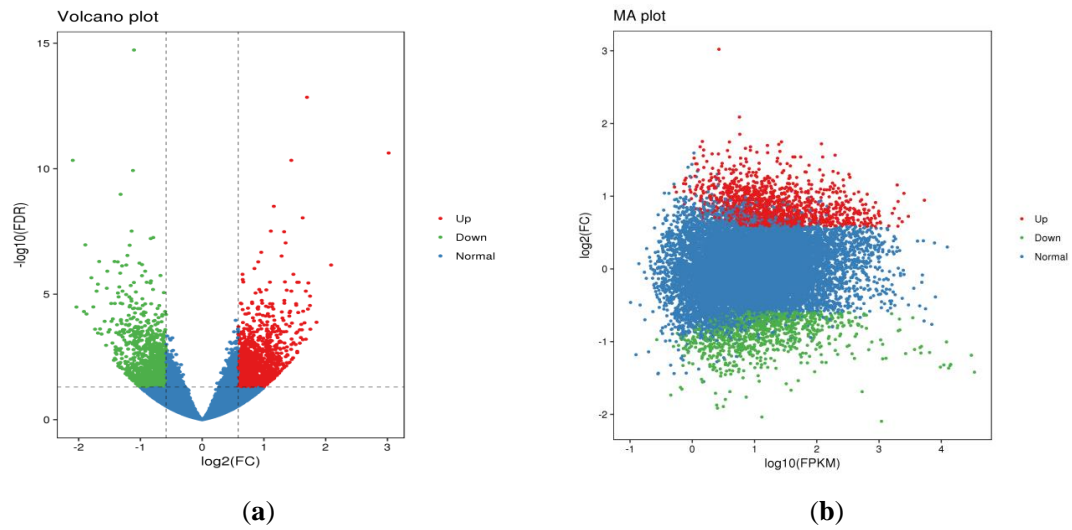

Figure S5. Volcano plots (a) and MA plot (b) of the DEGs upregulated and downregulated between N1 VS N3 treatments.

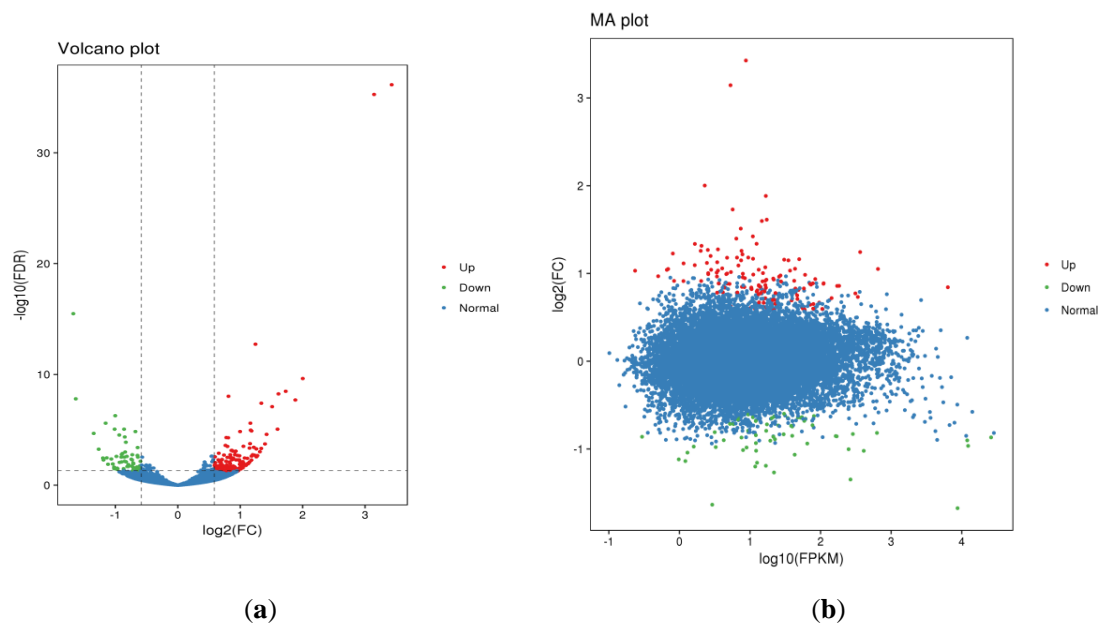

Figure S6. Volcano plots (a) and MA plot (b) of the DEGs upregulated and downregulated between N2 VS N3 treatments.

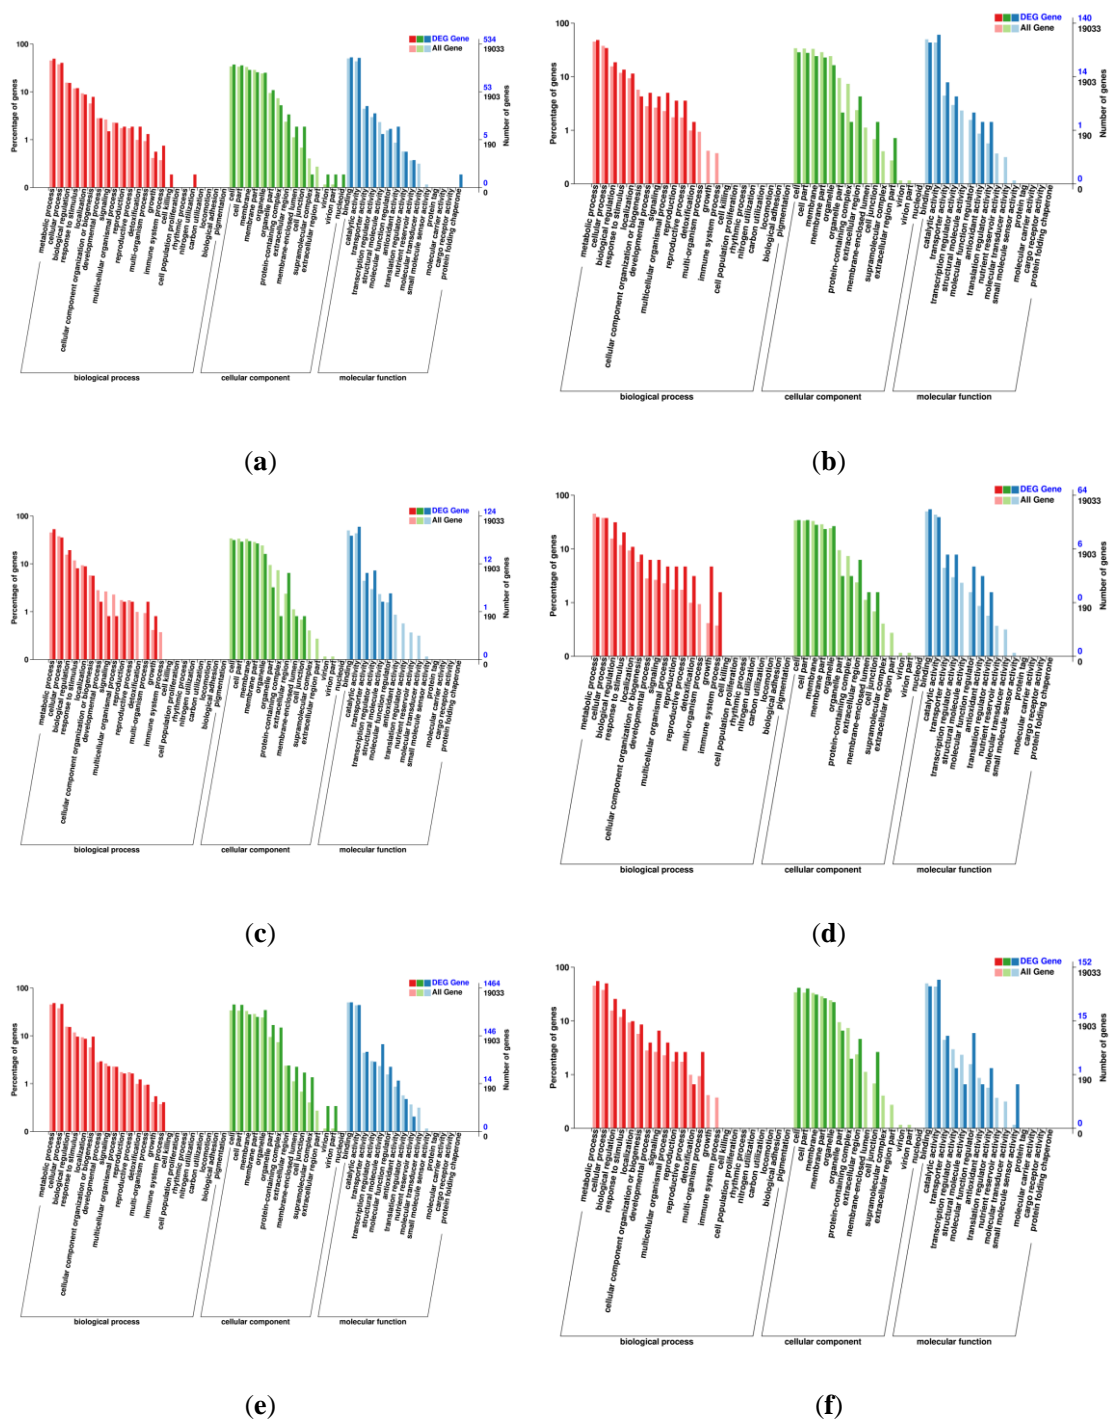

Figure S7. GO annotation of the DEGs. (a) GO annotation of the DEGs of N0 and N1. (b) GO annotation of the DEGs of N0 and N2. (c) GO annotation of the DEGs of N0 and N3. (d) GO annotation of the DEGs of N1 and N2. (e) GO annotation of the DEGs of N1 and N3. (f) GO annotation of the DEGs of N2 and N3

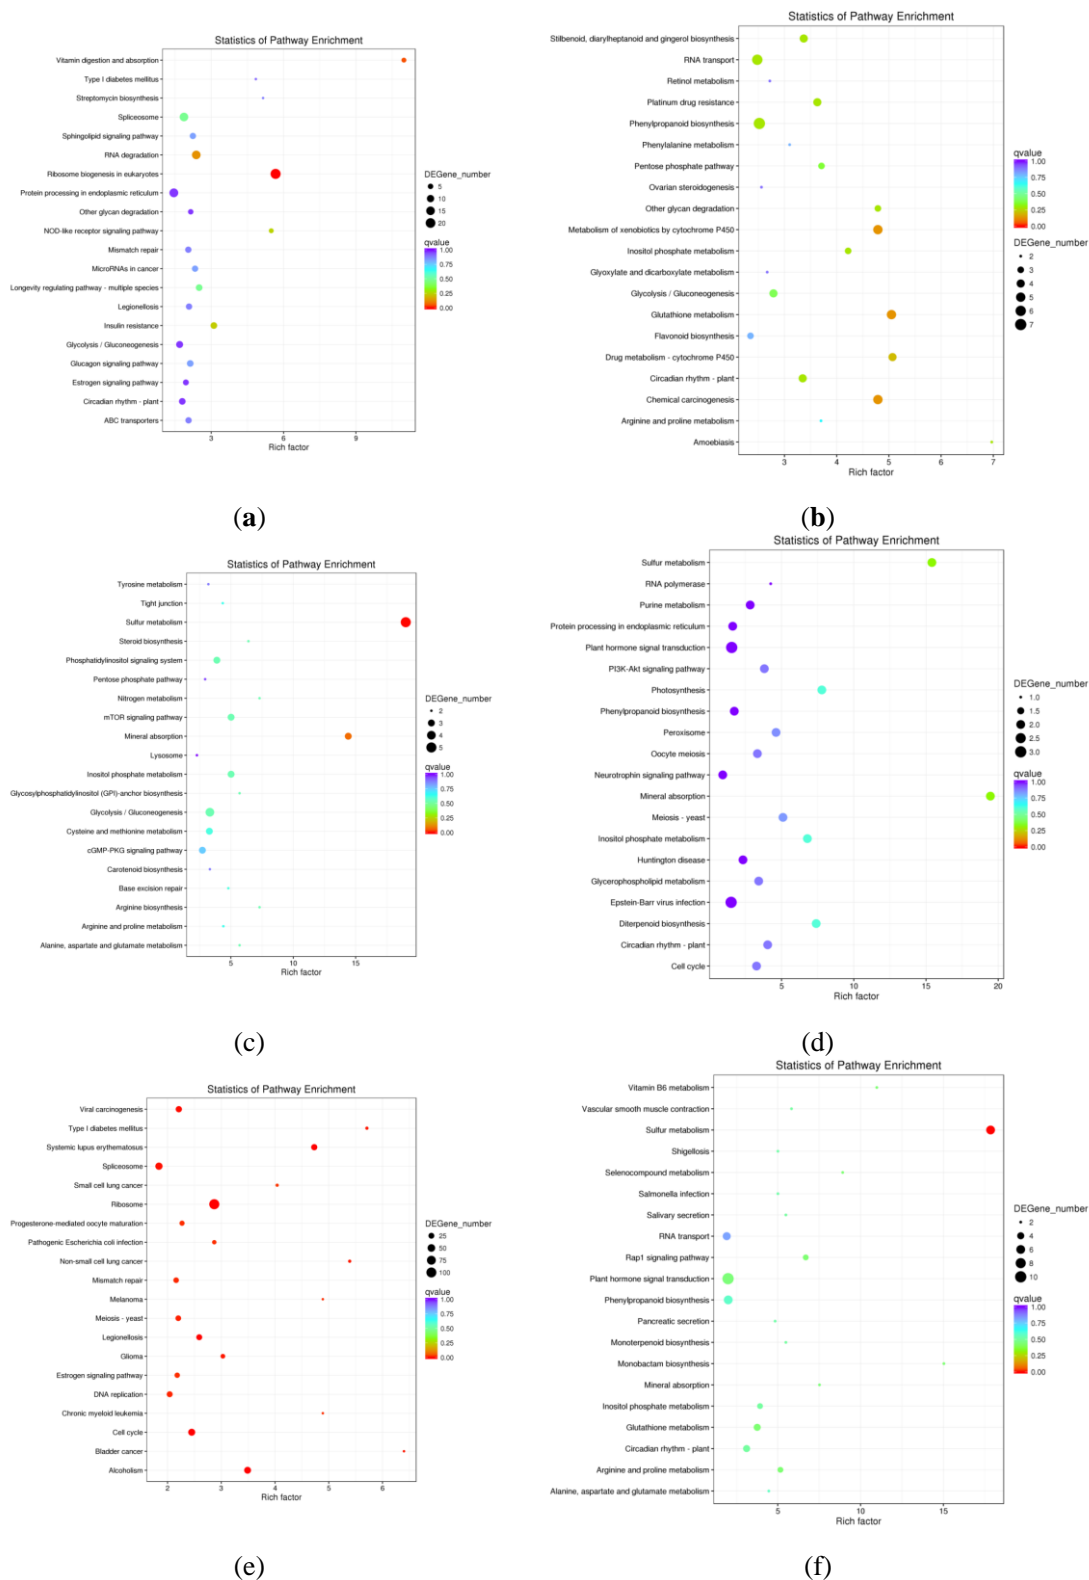

Figure S8. KEGG enrichment analysis of the DEGs. (a) KEGG enrichment analysis of the DEGs of N0 and N1. (b) KEGG enrichment analysis of the DEGs of N0 and N2. (c) KEGG enrichment analysis of the DEGs of N0 and N3. (d) KEGG enrichment analysis of the DEGs of N1 and N2. (e) KEGG enrichment analysis of the DEGs of N1 and N3. (f) KEGG enrichment analysis of the DEGs of N2 and N3.
